# Supplementary material
Source: publisher figshare collection journal article supplement (https://acs.figshare.com/ndownloader/files/3942361)
Supplement: Supplementary file 1 [file 3942361]

## **A Non-Racemic Synthesis of GK-GKRP Disruptor AMG-3969**

Matthew P. Bourbeau<sup>\*1</sup>, Kate S. Ashton<sup>1</sup>, Jie Yan<sup>2</sup>, and David J. St. Jean, Jr.<sup>1</sup>

### **Supporting information**

- 1) Analysis of conversion of compound **4** to compound **5**.....S2
- 2) Proton and carbon NMR spectra.....S3 - S15
- 3) Chiral SFC analysis of compound **5**.....S16

Analysis of conversion of compound 4 to compound 5

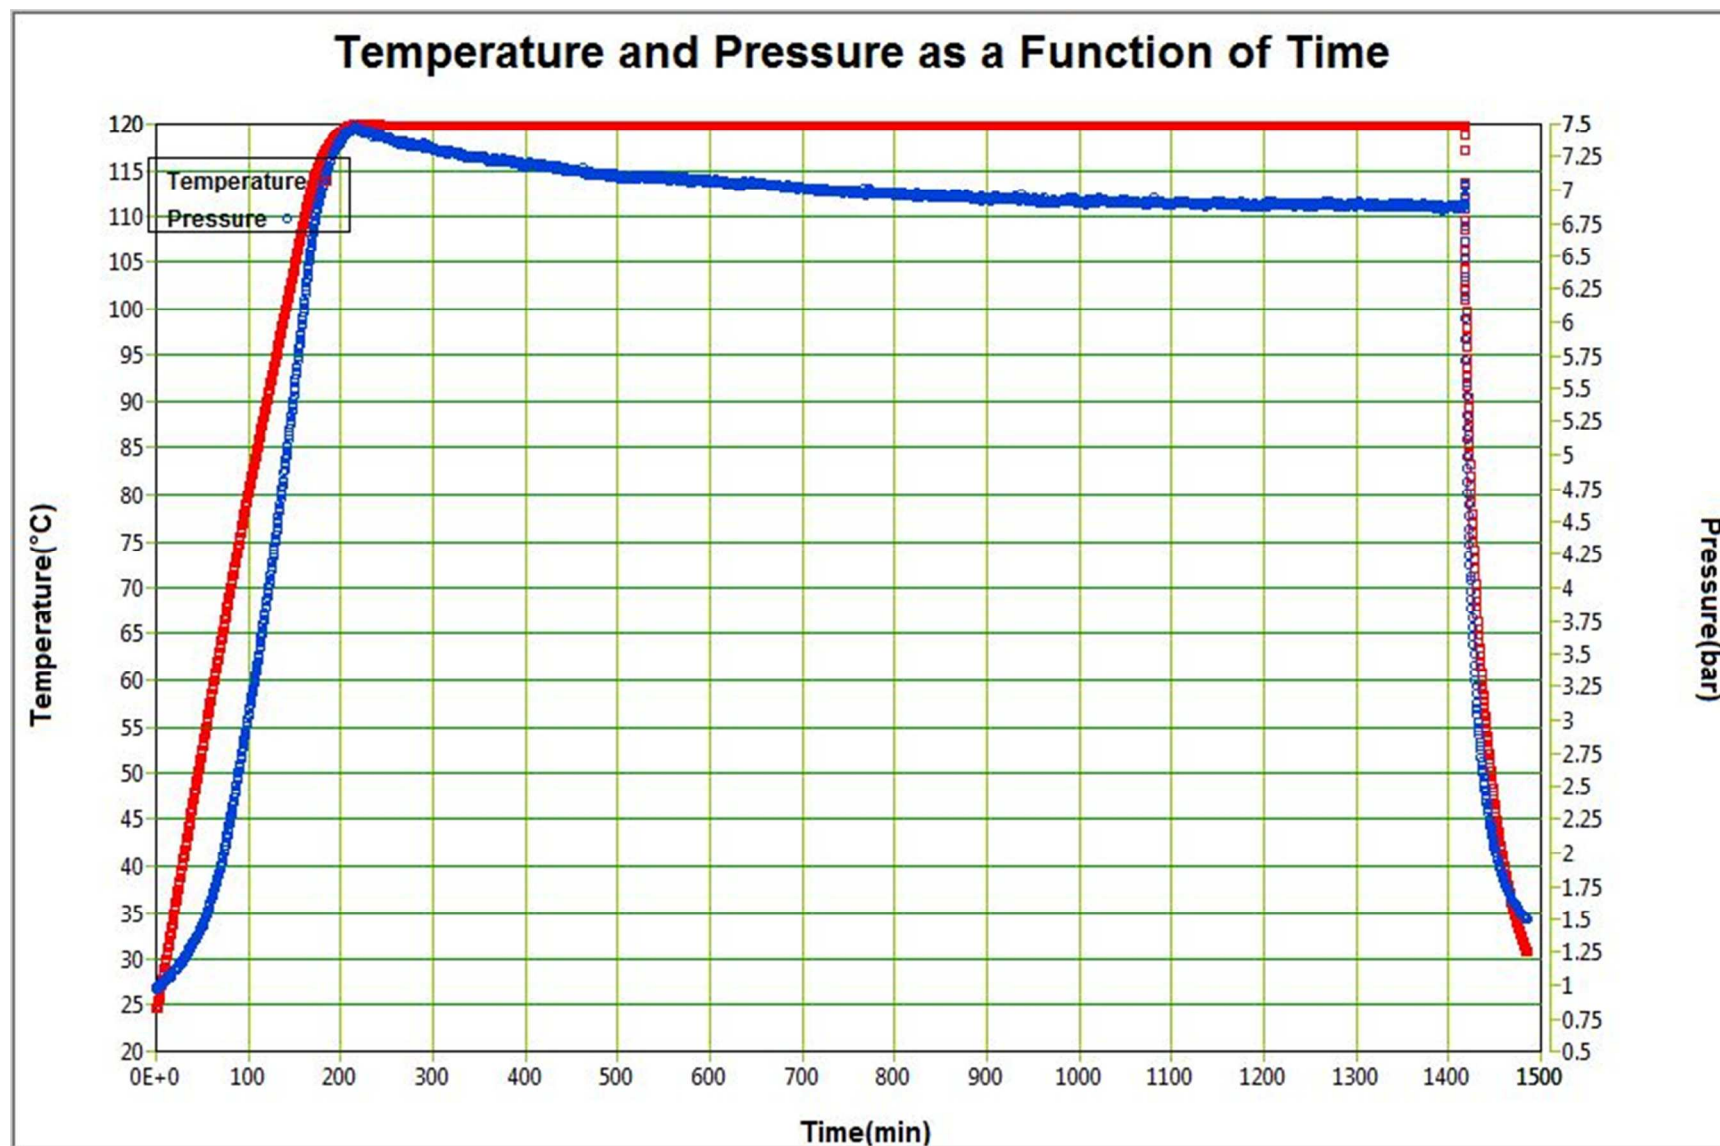

Sample: Med Chem Pressure Tube SM  
Size: 2.6000 mg  
Method: Ramp  
Comment: Research Sample.

DSC

File: MED CHEM PRESSURE TUBE SM  
Operator: SMS  
Run Date: 14-Sep-11 09:41  
Instrument: DSC Q1000 V9.9 Build 303

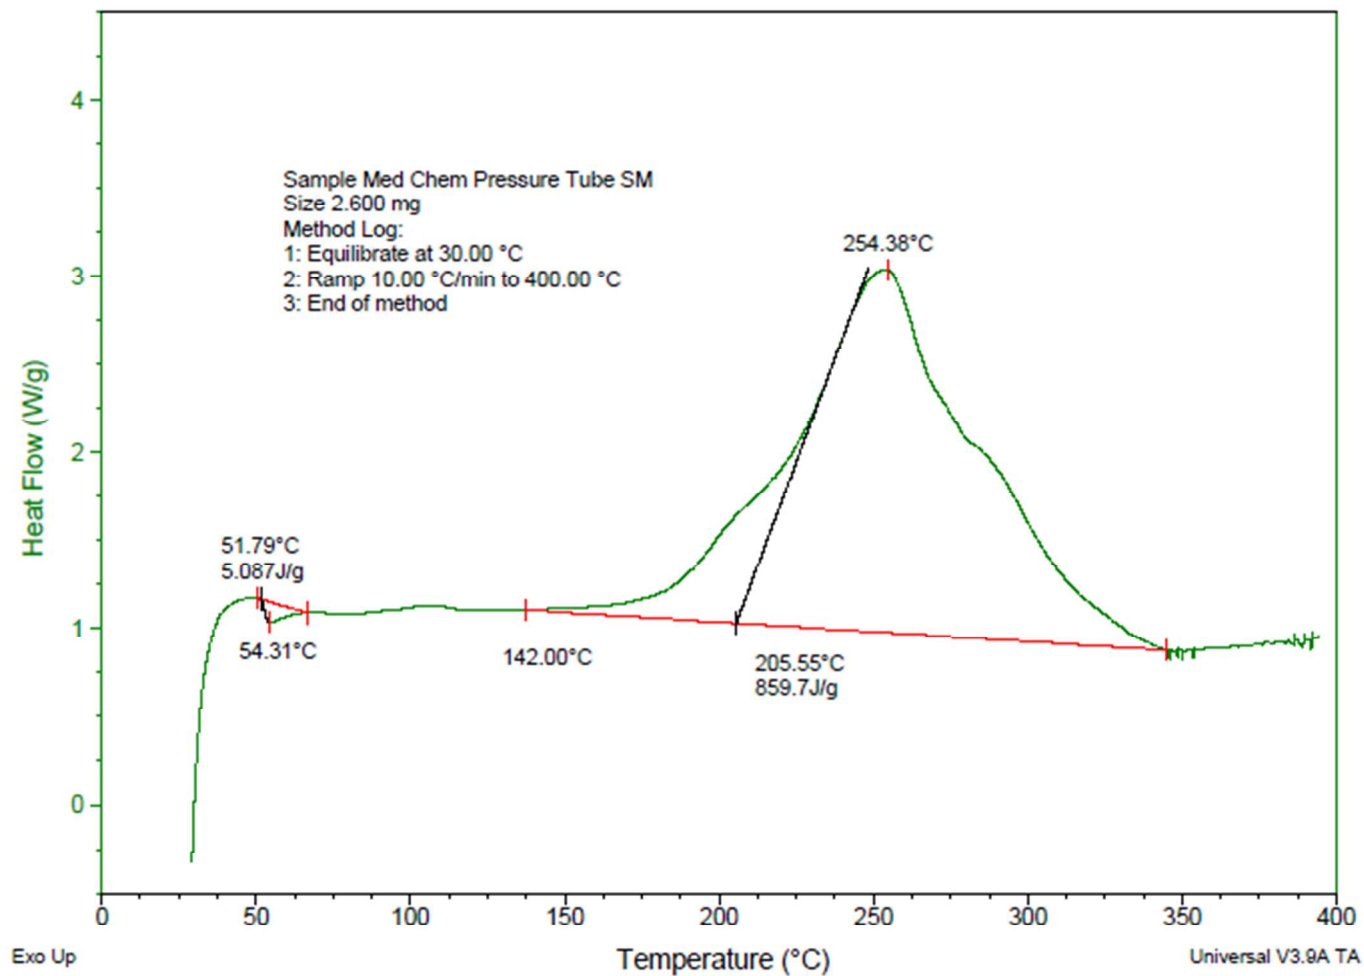

## Proton and carbon NMR spectra

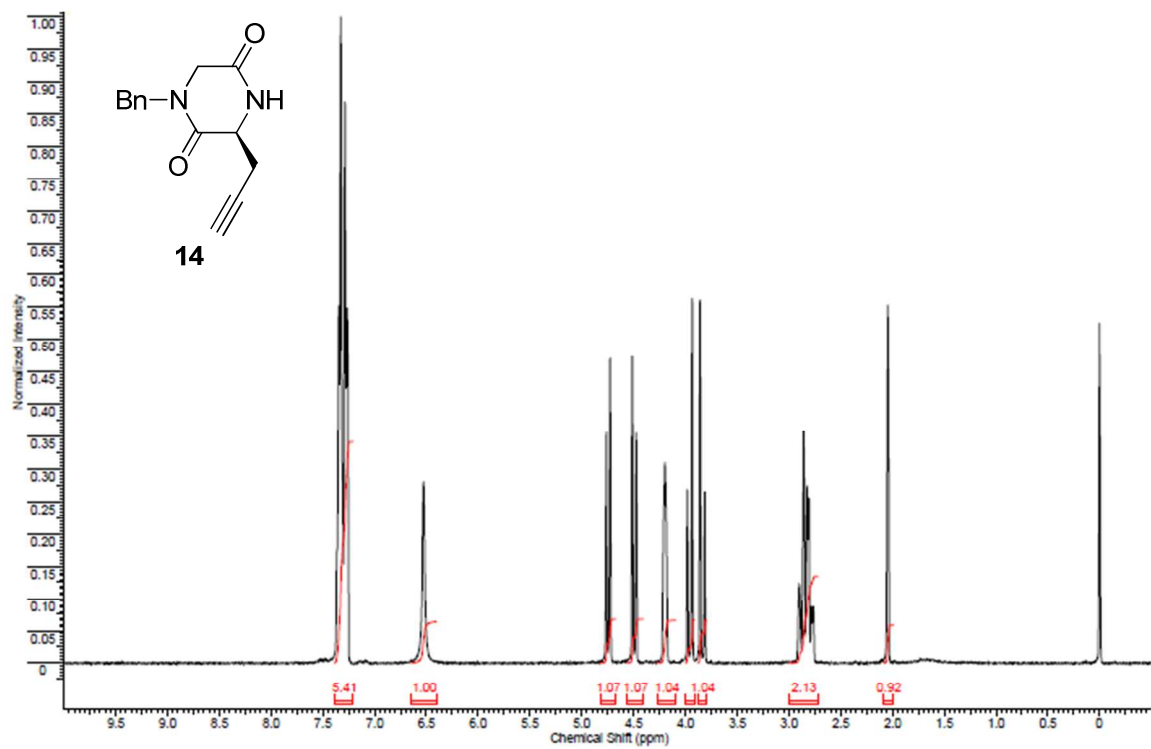

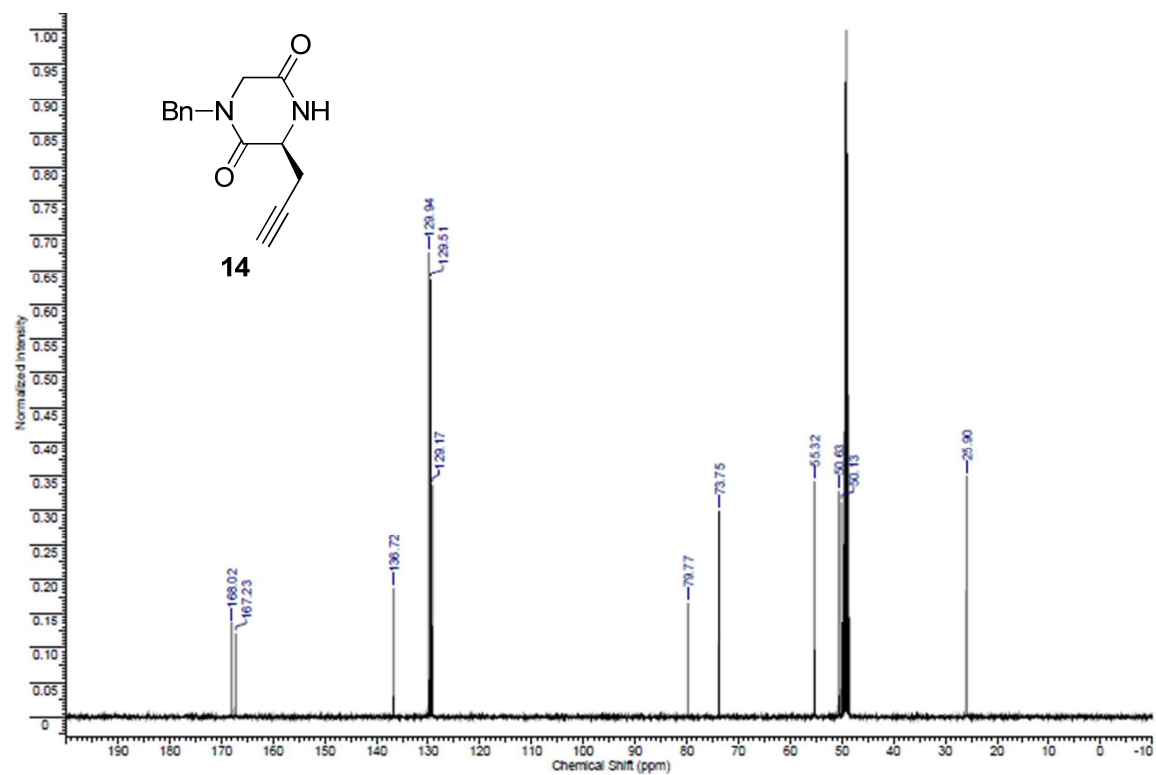

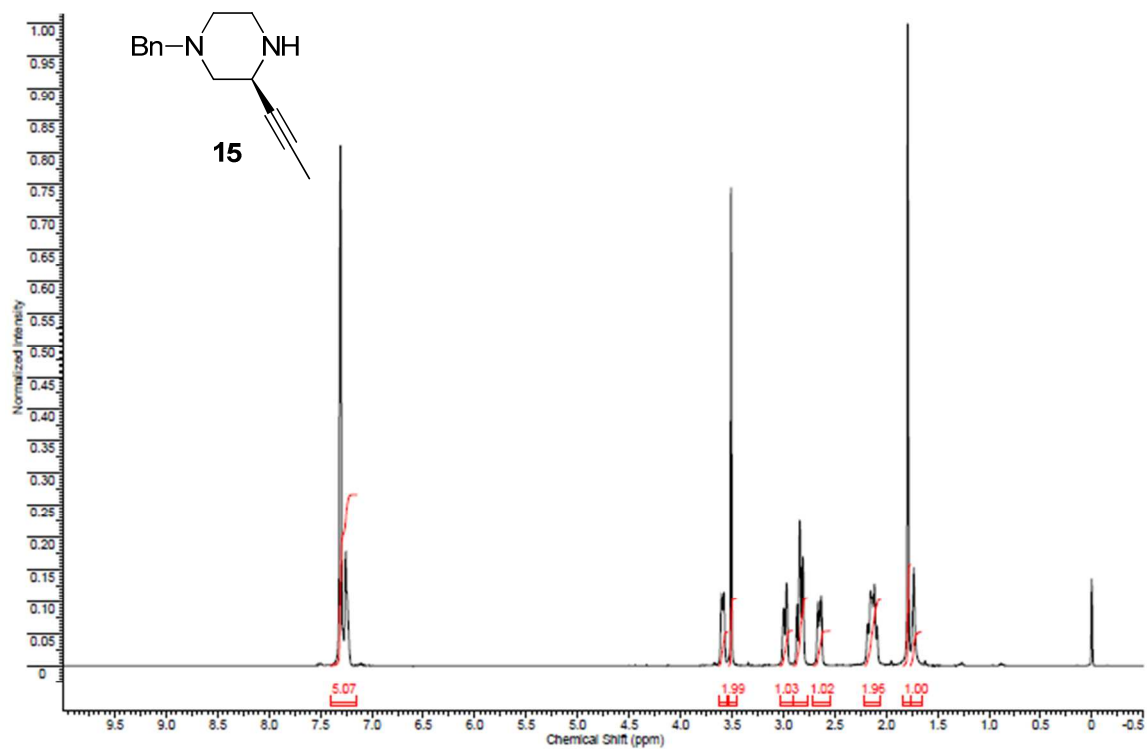

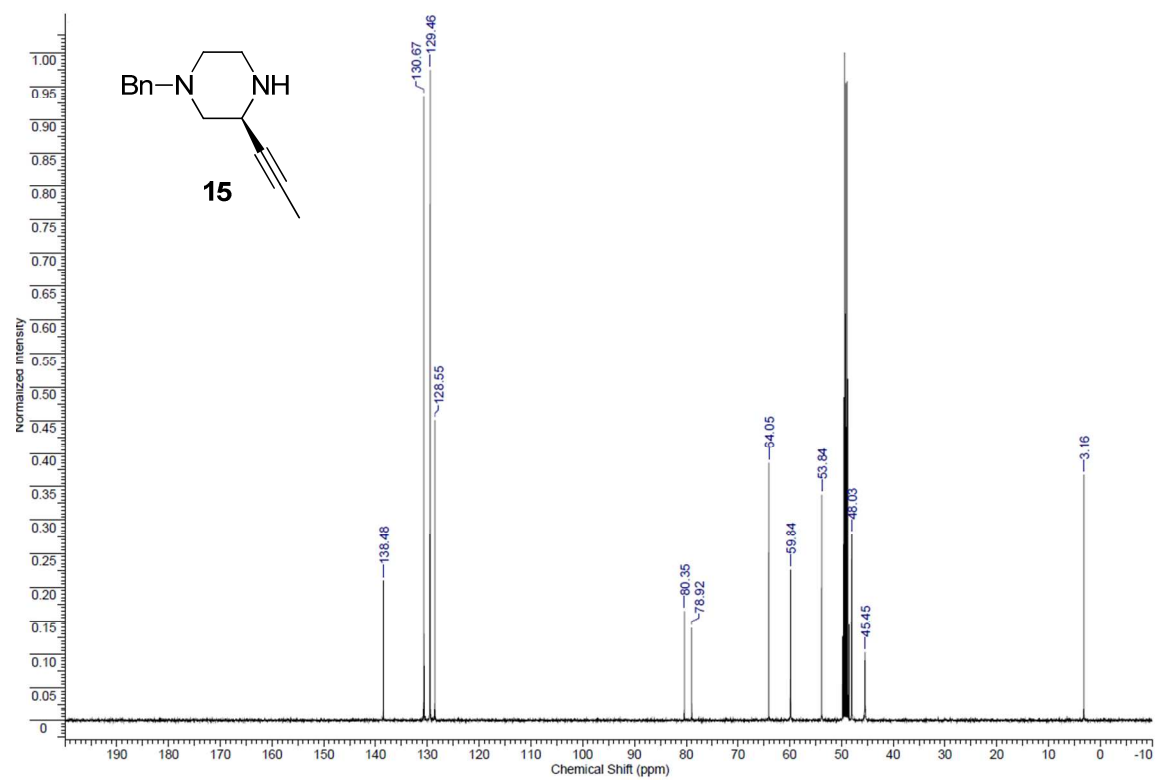

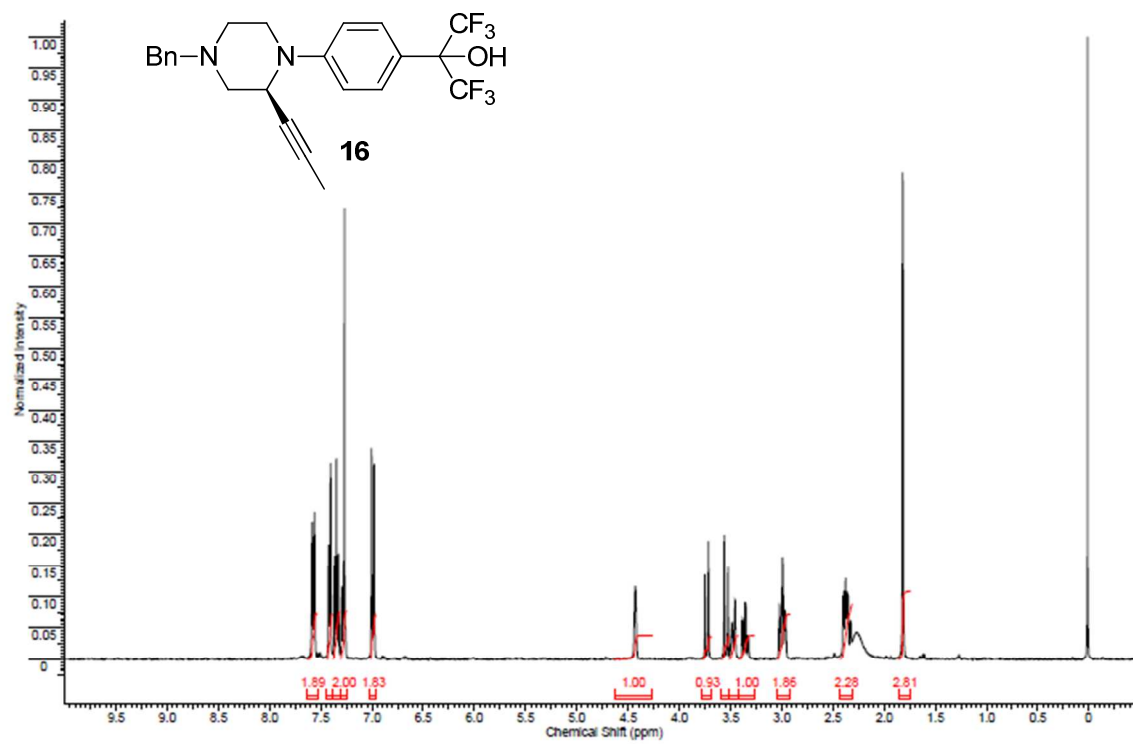



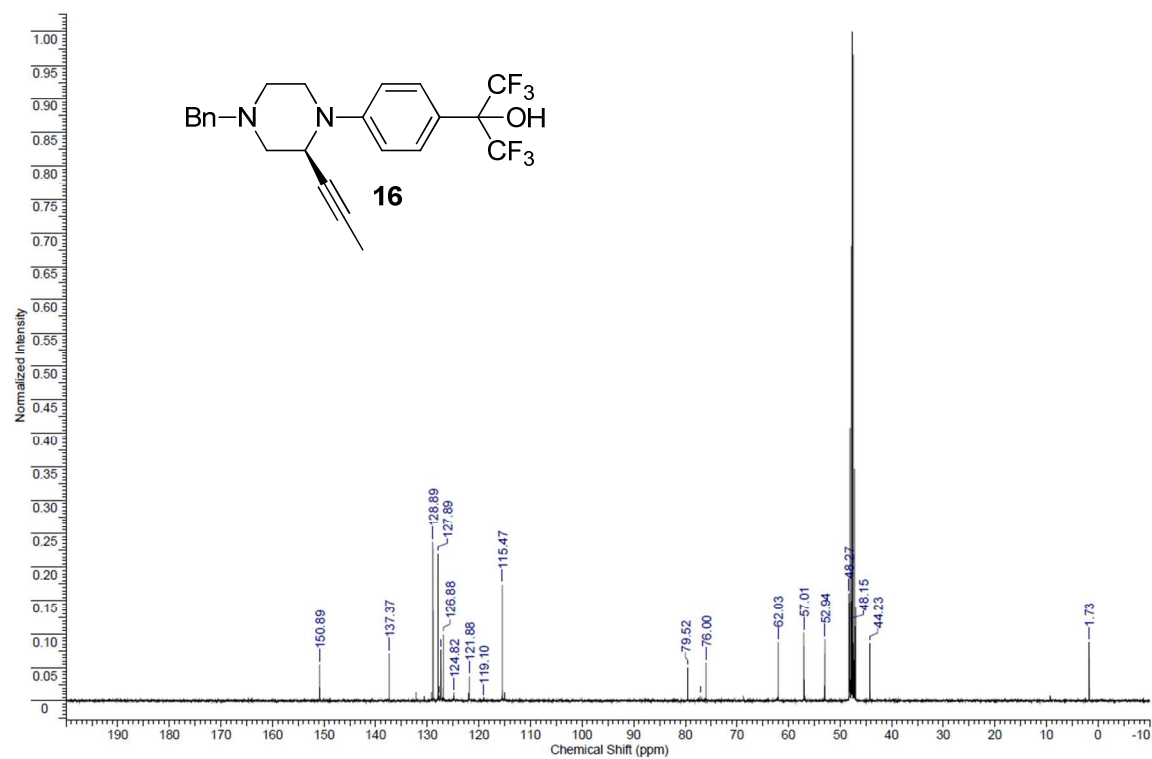

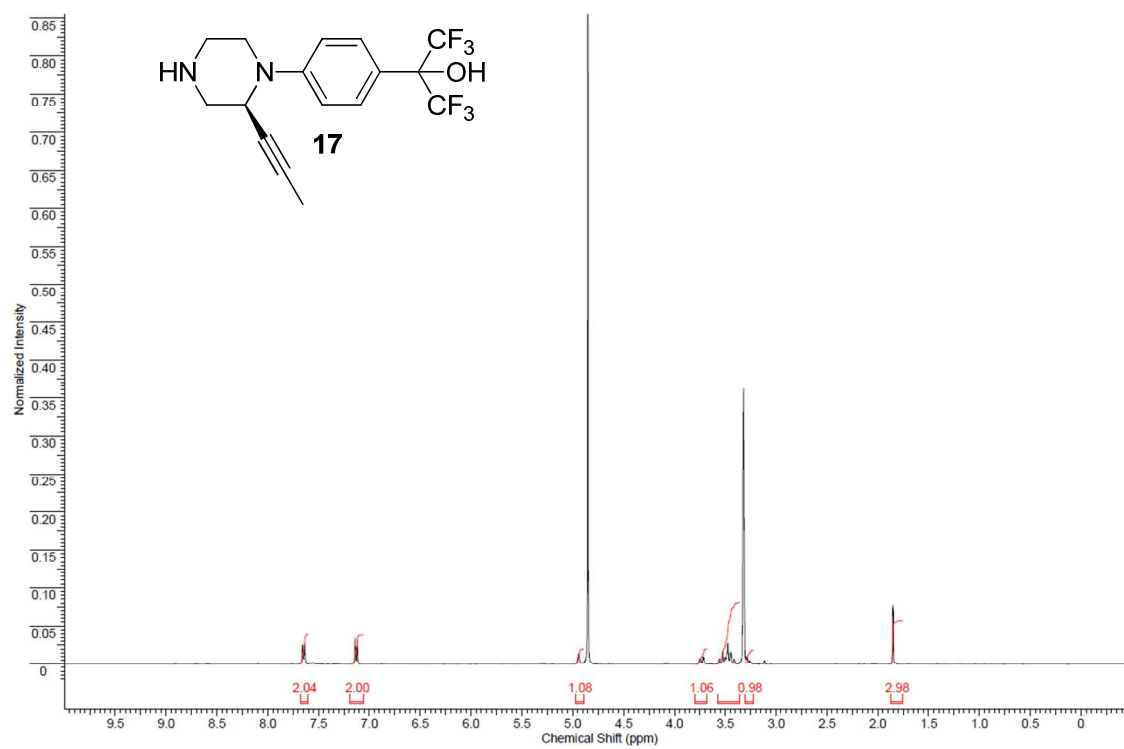

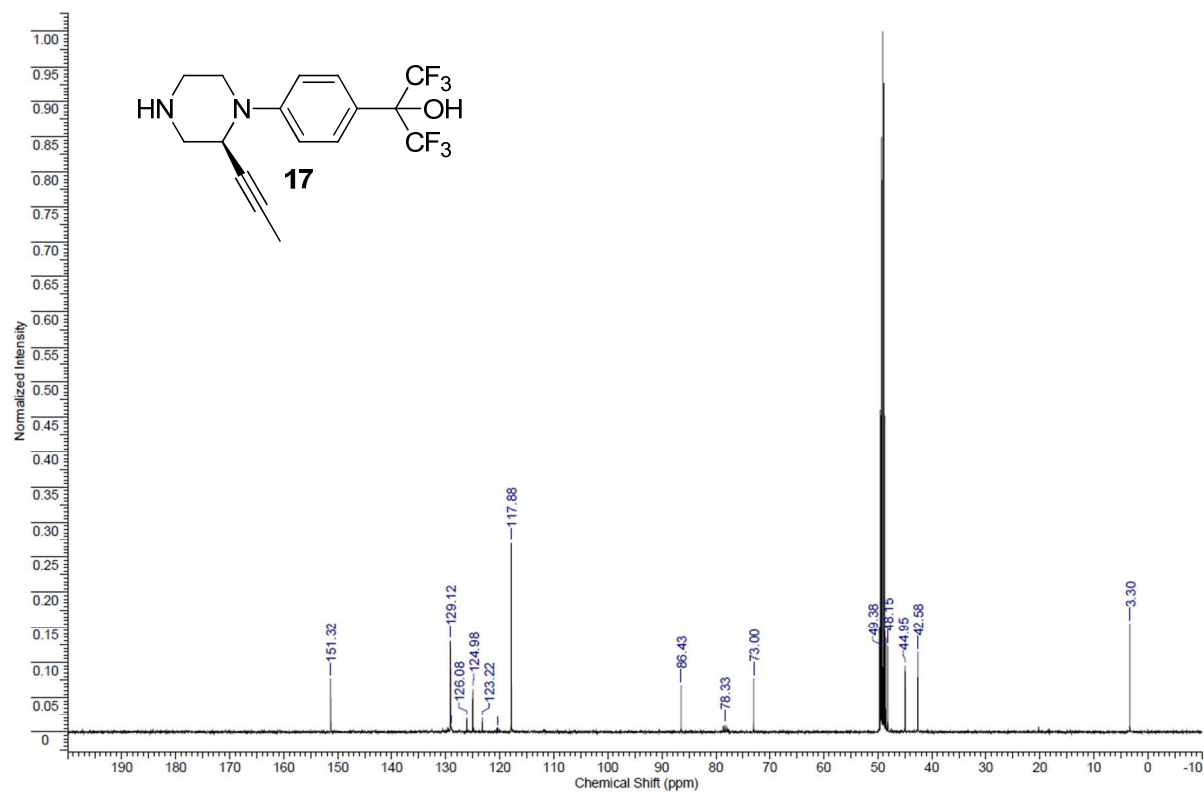

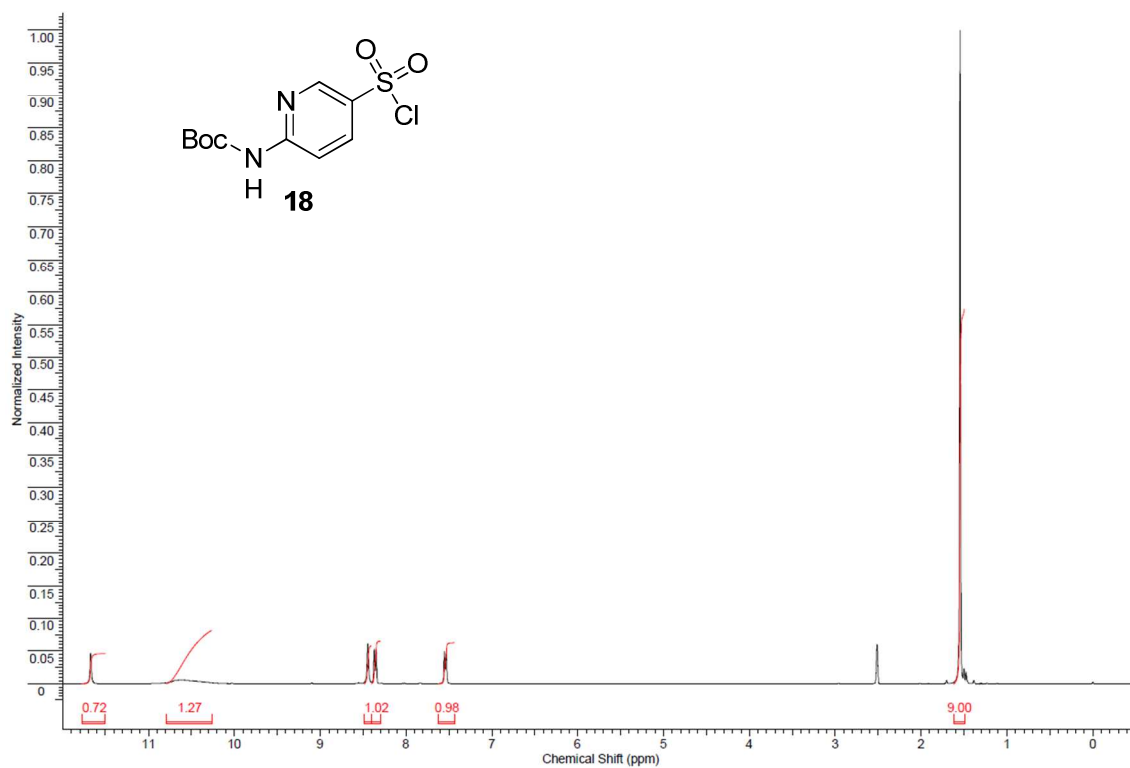

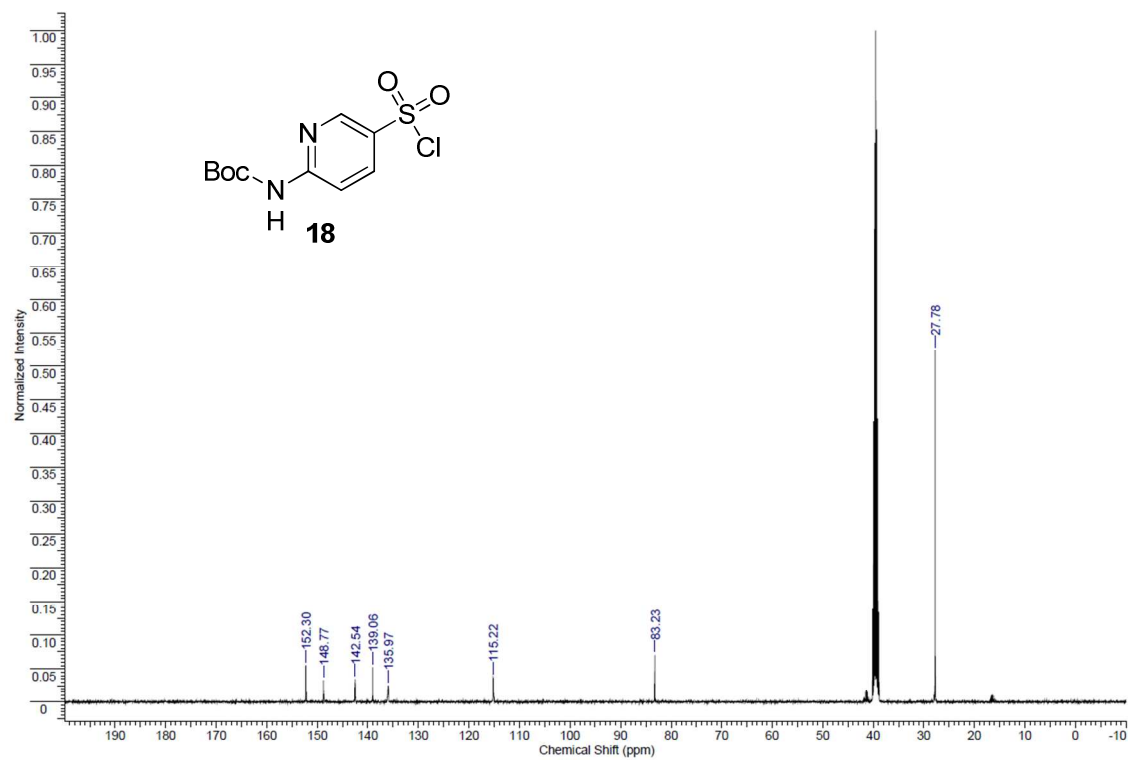

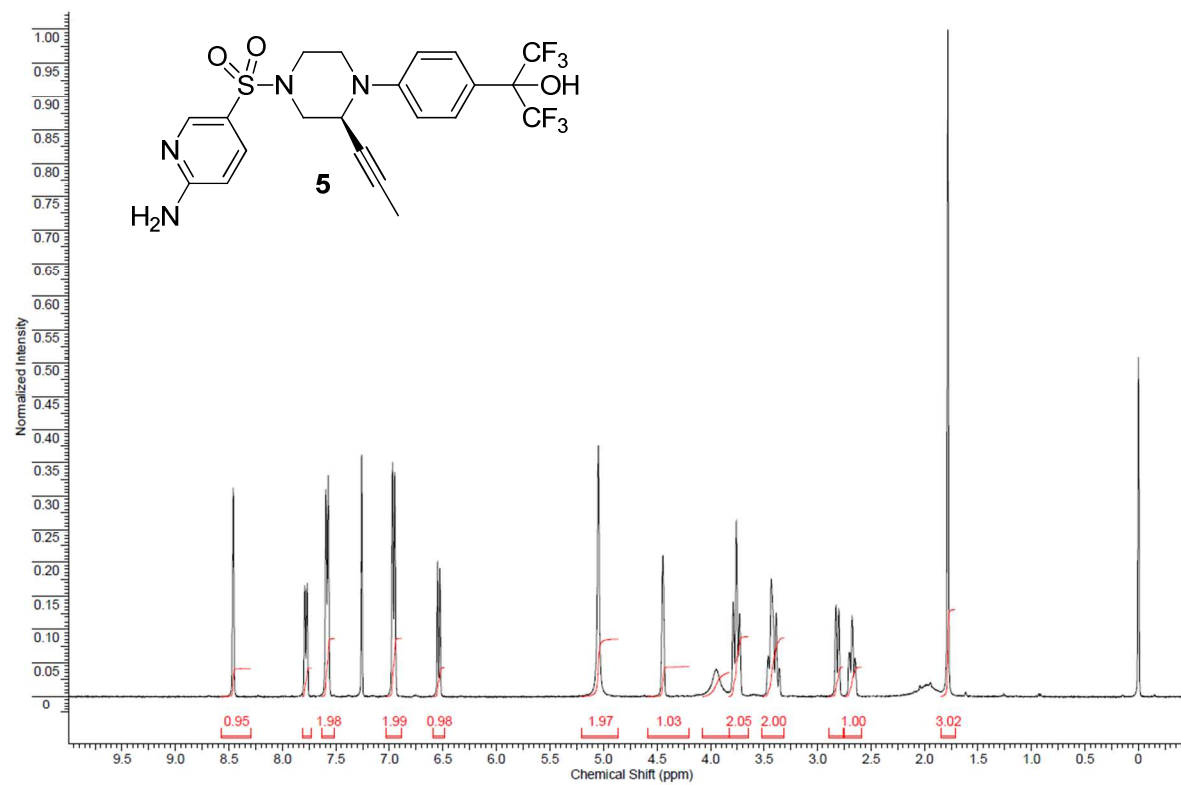

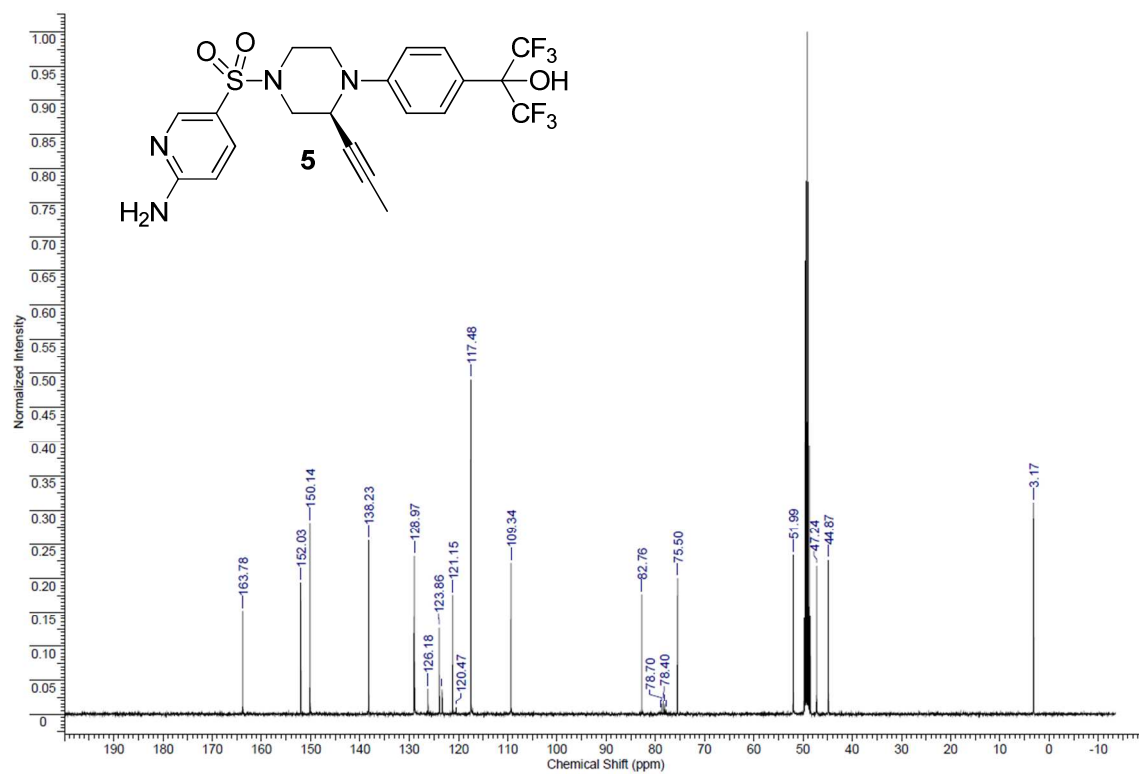

### Chiral SFC Analysis of 5

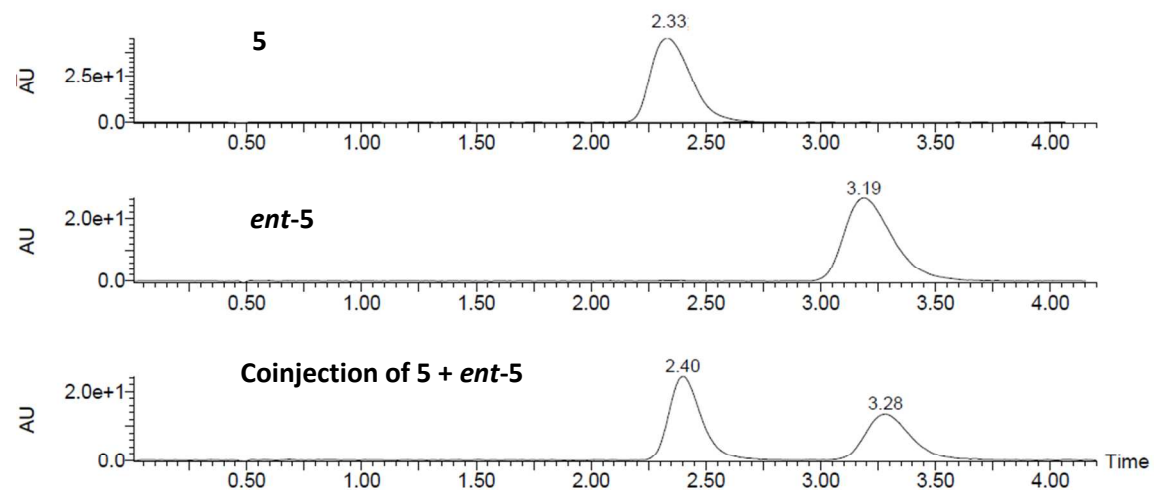

Analytical SFC conditions: AD (5 $\mu$ m, 4.6mm x 15cm) column with 30% MeOH with 20mM ammonia in super critical CO<sub>2</sub>; flow rate = 4.0 mL/min, T = 40 °C, pressure = 100 bar. The enantiomeric excess for AMG-3969 was determined to be > 99.5%.
